# Supplementary material
Source: HighWire-hosted journal article supplement (https://gut.bmj.com/content/72/8/1497)
Supplement: inline-supplementary-material-1 [file inline-supplementary-material-1.pdf]

**Table S1. Clinical feature of CRC patients (Cohort I)**

| <b>Clinical feature</b> | <b>High expression<br/>(n=91)</b> | <b>%</b> | <b>Low expression<br/>(n=100)</b> | <b>%</b> |
|-------------------------|-----------------------------------|----------|-----------------------------------|----------|
| <b>Age</b>              | 67.9±10.7                         |          | 66.6±13.9                         |          |
| <b>Gender</b>           |                                   |          |                                   |          |
| M                       | 43                                | 47.3     | 64                                | 64.0     |
| F                       | 48                                | 52.7     | 36                                | 36.0     |
| <b>TNM</b>              |                                   |          |                                   |          |
| I                       | 5                                 | 5.5      | 12                                | 12.0     |
| II                      | 24                                | 26.4     | 35                                | 35.0     |
| III                     | 26                                | 28.6     | 30                                | 30.0     |
| IV                      | 36                                | 39.5     | 23                                | 23.0     |
| <b>Localization</b>     |                                   |          |                                   |          |
| Colon                   | 57                                | 46       | 61                                | 35.2     |
| Rectum                  | 34                                | 54       | 39                                | 64.8     |

**Table S2. Clinical feature of CRC patients (Cohort II)**

| <b>Clinical feature</b> | <b>High expression<br/>(n=104)</b> | <b>%</b> | <b>Low expression<br/>(n=80)</b> | <b>%</b> |
|-------------------------|------------------------------------|----------|----------------------------------|----------|
| <b>Age</b>              | 57.9±11.8                          |          | 59.7±12.4                        |          |
| <b>Gender</b>           |                                    |          |                                  |          |
| M                       | 61                                 | 58.7     | 42                               | 52.5     |
| F                       | 43                                 | 41.3     | 38                               | 47.5     |
| <b>TNM</b>              |                                    |          |                                  |          |
| I                       | 5                                  | 4.8      | 11                               | 13.7     |
| II                      | 38                                 | 36.5     | 34                               | 42.5     |
| III                     | 57                                 | 54.8     | 30                               | 37.5     |
| IV                      | 4                                  | 3.9      | 5                                | 6.3      |
| <b>Localization</b>     |                                    |          |                                  |          |
| Colon                   | 57                                 | 54.8     | 42                               | 52.5     |
| Rectum                  | 47                                 | 45.2     | 38                               | 47.5     |
| <b>Differentiation</b>  |                                    |          |                                  |          |
| Low                     | 31                                 | 29.8     | 22                               | 27.5     |
| High                    | 73                                 | 70.2     | 58                               | 72.5     |

**Table S3. Primer sequences for qPCR**

| Species      | Target gene       | Forward/Reverse | Sequence (5' to 3')     |
|--------------|-------------------|-----------------|-------------------------|
| Mus musculus | <i>ACTB</i>       | Forward         | GGCCAACCGTGAAAAGATGA    |
| Mus musculus | <i>ACTB</i>       | Reverse         | TACGACCAGAGGCATACAGG    |
| Mus musculus | <i>RELA</i> (p65) | Forward         | CCGGGATGGCTACTATGAGG    |
| Mus musculus | <i>RELA</i> (p65) | Reverse         | TCTTCACACACTGGATCCCC    |
| Mus musculus | <i>CXCL1</i>      | Forward         | TCCAGAGCTTGAAGGTGTTGCC  |
| Mus musculus | <i>CXCL1</i>      | Reverse         | AACCAAGGGAGCTTCAGGGTCA  |
| Mus musculus | <i>CXCL3</i>      | Forward         | TACGATCAGCGCCTCAATGCCA  |
| Mus musculus | <i>CXCL3</i>      | Reverse         | AGCAGGAAACCAGCCACTAGCT  |
| Mus musculus | <i>CXCL5</i>      | Forward         | CCGCTGGCATTCTGTGTTGCTGT |
| Mus musculus | <i>CXCL5</i>      | Reverse         | CAGGGATCACCTCCAAATTAGCG |
| Mus musculus | <i>CCND1</i>      | Forward         | GGAGATTGTGCCATCCATGC    |
| Mus musculus | <i>CCND1</i>      | Reverse         | GACCTCCTCTTCGCACTTCT    |
| Mus musculus | <i>OPN1SW</i>     | Forward         | CTTACGGCTTGTACCATCC     |
| Mus musculus | <i>OPN1SW</i>     | Reverse         | CCTGCACACCATCTCCAGAA    |
| Mus musculus | <i>TAPBP</i>      | Forward         | CAGCACTCTCTTCAGCCTCT    |
| Mus musculus | <i>TAPBP</i>      | Reverse         | GTTATGGGTGAGGACGGTCA    |
| Mus musculus | <i>TAP1</i>       | Forward         | CCTGGGCCCTAAGAAGAGAC    |
| Mus musculus | <i>TAP1</i>       | Reverse         | GAATCCAGTCAGTGATGCGG    |
| Mus musculus | <i>TNFSF10</i>    | Forward         | TGTGTCTGTGGCTGTGACTT    |
| Mus musculus | <i>TNFSF10</i>    | Reverse         | TCCCAGAAATCCTCATCCGT    |
| Mus musculus | <i>IL6</i>        | Forward         | AGCCAGAGTCCTTCAGAGAGAT  |
| Mus musculus | <i>IL6</i>        | Reverse         | GCCACTCCTTCTGTGACTCC    |
| Homo sapiens | <i>CXCL1</i>      | Forward         | CACTCAAGAATGGGCGGAAA    |
| Homo sapiens | <i>CXCL1</i>      | Reverse         | CCTTCTGGTCAGTTGGATTTGT  |
| Homo sapiens | <i>ACTB</i>       | Forward         | CAACCGCGAGAAGATGACC     |
| Homo sapiens | <i>ACTB</i>       | Reverse         | CCAGAGGCGTACAGGGATAG    |
| Homo sapiens | <i>RELA</i> (p65) | Forward         | CCGGGATGGCTTCTATGAGG    |
| Homo sapiens | <i>RELA</i> (p65) | Reverse         | CTGACTGATAGCCTGCTCCA    |

**Table S4. Target sequence for shRNA**

| shRNA name | Target sequence (5' to 3') |
|------------|----------------------------|
| shNC       | TTCTCCGAACGTGTCACGT        |
| shYTHDF1-1 | GATACAGTTCATGACAATGA       |
| shYTHDF1-2 | CAGGCTGGAGAATAACGACAA      |

**Table S5. Primer sequences for MeRIP-qPCR**

| <b>Primer name</b>     | <b>Sequence (5' to 3')</b> |
|------------------------|----------------------------|
| <i>RELA</i> -MeRIP#1 F | GACCCAGGAGTGTTACAGA        |
| <i>RELA</i> -MeRIP#1 R | AGCTGTGGAGTGAGACATGG       |
| <i>RELA</i> -MeRIP#2 F | GGCTTCCCAATGGTCTCTCA       |
| <i>RELA</i> -MeRIP#2 R | CACCTTAGGAGCTGATCTGACT     |
| <i>RELA</i> -MeRIP#3 F | GCTTCCATCTCCAGCTTCTAG      |
| <i>RELA</i> -MeRIP#3 R | GTGTACAGGAATCCGCGTG        |
| <i>RELA</i> -MeRIP#4 F | ACAGGTGGGATGTTGCTGG        |
| <i>RELA</i> -MeRIP#4 R | CCTGCCCTCCTGACTCTACA       |
